# Supplementary material for: Network Pharmacology of Yougui Pill Combined with Buzhong Yiqi Decoction for the Treatment of Sexual Dysfunction
Source: Evid Based Complement Alternat Med. 2019 Nov 11;2019:1243743. doi: 10.1155/2019/1243743 (PMC6877955; doi:10.1155/2019/1243743)
Supplement: Supplementary Materials — Supplementary Table 1: the 73 intersection-related targets. Supplementary Table 2: the top 10 proteins with higher degrees. Supplementary file 1: 13 herbal medicine and 64 important components with 1747 targets. [file 1243743.f1.zip]

Archive with 2 entries (2 files):
- 1243743.f1/Supplymentary file 1.xlsx
- 1243743.f1/Supplymentary table_ECAM_2904680.docx
