# Supplementary material for: Network Pharmacology of Yougui Pill Combined with Buzhong Yiqi Decoction for the Treatment of Sexual Dysfunction
Source: Evid Based Complement Alternat Med. 2019 Nov 11;2019:1243743. doi: 10.1155/2019/1243743 (PMC6877955; doi:10.1155/2019/1243743)
Supplement: Supplementary Materials — Supplementary Table 1: the 73 intersection-related targets. Supplementary Table 2: the top 10 proteins with higher degrees. Supplementary file 1: 13 herbal medicine and 64 important components with 1747 targets. [file 1243743.f1.zip › 1243743.f1/Supplymentary file 1.xlsx]

## Sheet:  targets_screening_forcyto
Molecule	Gene ID	Symbol	Score
(2's;3'r)-5-(n;n-dimethyl-3'-phenylisoseryl)-taxachitriene a	3764	KCNJ8	80.882
(2's;3'r)-5-(n;n-dimethyl-3'-phenylisoseryl)-taxachitriene a	3768	KCNJ12	80.882
(2's;3'r)-5-(n;n-dimethyl-3'-phenylisoseryl)-taxachitriene a	3356	HTR2A	80.882
(2's;3'r)-5-(n;n-dimethyl-3'-phenylisoseryl)-taxachitriene a	3357	HTR2B	80.882
(2's;3'r)-5-(n;n-dimethyl-3'-phenylisoseryl)-taxachitriene a	150	ADRA2A	80.882
(2's;3'r)-5-(n;n-dimethyl-3'-phenylisoseryl)-taxachitriene a	3351	HTR1B	80.882
(2's;3'r)-5-(n;n-dimethyl-3'-phenylisoseryl)-taxachitriene a	3767	KCNJ11	80.882
(2's;3'r)-5-(n;n-dimethyl-3'-phenylisoseryl)-taxachitriene a	3772	KCNJ15	80.882
(2's;3'r)-5-(n;n-dimethyl-3'-phenylisoseryl)-taxachitriene a	3358	HTR2C	80.882
(2's;3'r)-5-(n;n-dimethyl-3'-phenylisoseryl)-taxachitriene a	3352	HTR1D	80.882
(2's;3'r)-5-(n;n-dimethyl-3'-phenylisoseryl)-taxachitriene a	1813	DRD2	80.882
(2's;3'r)-5-(n;n-dimethyl-3'-phenylisoseryl)-taxachitriene a	3766	KCNJ10	80.882
(2's;3'r)-5-(n;n-dimethyl-3'-phenylisoseryl)-taxachitriene a	3350	HTR1A	80.882
(2's;3'r)-5-(n;n-dimethyl-3'-phenylisoseryl)-taxachitriene a	152	ADRA2C	80.882
(2's;3'r)-5-(n;n-dimethyl-3'-phenylisoseryl)-taxachitriene a	1814	DRD3	80.882
(2's;3'r)-5-(n;n-dimethyl-3'-phenylisoseryl)-taxachitriene a	3758	KCNJ1	80.882
(2's;3'r)-5-(n;n-dimethyl-3'-phenylisoseryl)-taxachitriene a	151	ADRA2B	80.882
(2's;3'r)-5-(n;n-dimethyl-3'-phenylisoseryl)-taxachitriene a	3770	KCNJ14	80.882
(2's;3'r)-5-(n;n-dimethyl-3'-phenylisoseryl)-taxachitriene a	333	APLP1	22.373
(2's;3'r)-5-(n;n-dimethyl-3'-phenylisoseryl)-taxachitriene a	3326	HSP90AB1	22.373
(2's;3'r)-5-(n;n-dimethyl-3'-phenylisoseryl)-taxachitriene a	1268	CNR1	22.373
(2's;3'r)-5-(n;n-dimethyl-3'-phenylisoseryl)-taxachitriene a	9368	SLC9A3R1	22.373
(2's;3'r)-5-(n;n-dimethyl-3'-phenylisoseryl)-taxachitriene a	947	CD34	22.373
(z)-citral	43	ACHE	80.882
(z)-citral	590	BCHE	80.882
(z)-citral	8292	COLQ	55.444
(z)-citral	60482	SLC5A7	22.373
(z)-citral	3084	NRG1	22.373
(z)-citral	29958	DMGDH	22.373
(z)-citral	6496	SIX3	22.373
(z)-citral	1401	CRP	22.373
(z)-citral	8492	PRSS12	22.373
(z)-citral	80736	SLC44A4	22.373
(z)-citral	501	ALDH7A1	22.373
(z)-citral	26052	DNM3	22.373
(z)-citral	429	ASCL1	22.373
(z)-citral	133121	ENPP6	22.373
(z)-citral	1006	CDH8	22.373
(z)-citral	2339	FNTA	22.373
(z)-citral	375790	AGRN	22.373
(z)-citral	1119	CHKA	22.373
(z)-citral	55349	CHDH	22.373
(z)-citral	2902	GRIN1	22.373
18alpha-glycyrrhetinic acid	367	AR	122.778
18alpha-glycyrrhetinic acid	2908	NR3C1	122.778
18alpha-glycyrrhetinic acid	301	ANXA1	122.778
18alpha-glycyrrhetinic acid	5731	PTGER1	80.882
18alpha-glycyrrhetinic acid	5734	PTGER4	80.882
18alpha-glycyrrhetinic acid	5732	PTGER2	80.882
18alpha-glycyrrhetinic acid	5733	PTGER3	80.882
18alpha-glycyrrhetinic acid	11314	CD300A	55.444
18alpha-glycyrrhetinic acid	9928	KIF14	55.444
18alpha-glycyrrhetinic acid	6715	SRD5A1	48
18alpha-glycyrrhetinic acid	1586	CYP17A1	48
18alpha-glycyrrhetinic acid	6546	SLC8A1	48
18alpha-glycyrrhetinic acid	2161	F12	48
18alpha-glycyrrhetinic acid	5618	PRLR	48
18alpha-glycyrrhetinic acid	2099	ESR1	48
18alpha-glycyrrhetinic acid	7442	TRPV1	48
18alpha-glycyrrhetinic acid	5468	PPARG	48
18alpha-glycyrrhetinic acid	2864	FFAR1	48
18alpha-glycyrrhetinic acid	5241	PGR	48
18alpha-glycyrrhetinic acid	4986	OPRK1	48
18alpha-glycyrrhetinic acid	9415	FADS2	48
18alpha-glycyrrhetinic acid	3992	FADS1	48
18alpha-glycyrrhetinic acid	5467	PPARD	48
18alpha-glycyrrhetinic acid	5742	PTGS1	48
18alpha-glycyrrhetinic acid	2182	ACSL4	48
18alpha-glycyrrhetinic acid	5743	PTGS2	48
18alpha-glycyrrhetinic acid	6785	ELOVL4	48
18alpha-glycyrrhetinic acid	3290	HSD11B1	48
18alpha-glycyrrhetinic acid	2181	ACSL3	48
18alpha-glycyrrhetinic acid	4306	NR3C2	48
18alpha-glycyrrhetinic acid	23604	DAPK2	22.373
18alpha-glycyrrhetinic acid	3248	HPGD	22.373
18alpha-glycyrrhetinic acid	101	ADAM8	22.373
18alpha-glycyrrhetinic acid	6369	CCL24	22.373
18alpha-glycyrrhetinic acid	3565	IL4	22.373
18beta-glycyrrhetinic acid	3290	HSD11B1	known target in KEGG
18beta-glycyrrhetinic acid	367	AR	122.778
18beta-glycyrrhetinic acid	2908	NR3C1	122.778
18beta-glycyrrhetinic acid	301	ANXA1	122.778
18beta-glycyrrhetinic acid	5731	PTGER1	80.882
18beta-glycyrrhetinic acid	5734	PTGER4	80.882
18beta-glycyrrhetinic acid	5732	PTGER2	80.882
18beta-glycyrrhetinic acid	5733	PTGER3	80.882
18beta-glycyrrhetinic acid	11314	CD300A	55.444
18beta-glycyrrhetinic acid	9928	KIF14	55.444
18beta-glycyrrhetinic acid	6715	SRD5A1	48
18beta-glycyrrhetinic acid	1586	CYP17A1	48
18beta-glycyrrhetinic acid	6546	SLC8A1	48
18beta-glycyrrhetinic acid	2161	F12	48
18beta-glycyrrhetinic acid	5618	PRLR	48
18beta-glycyrrhetinic acid	2099	ESR1	48
18beta-glycyrrhetinic acid	7442	TRPV1	48
18beta-glycyrrhetinic acid	5468	PPARG	48
18beta-glycyrrhetinic acid	2864	FFAR1	48
18beta-glycyrrhetinic acid	5241	PGR	48
18beta-glycyrrhetinic acid	4986	OPRK1	48
18beta-glycyrrhetinic acid	9415	FADS2	48
18beta-glycyrrhetinic acid	3992	FADS1	48
18beta-glycyrrhetinic acid	5467	PPARD	48
18beta-glycyrrhetinic acid	5742	PTGS1	48
18beta-glycyrrhetinic acid	2182	ACSL4	48
18beta-glycyrrhetinic acid	5743	PTGS2	48
18beta-glycyrrhetinic acid	6785	ELOVL4	48
18beta-glycyrrhetinic acid	2181	ACSL3	48
18beta-glycyrrhetinic acid	4306	NR3C2	48
18beta-glycyrrhetinic acid	782	CACNB1	25.857
18beta-glycyrrhetinic acid	781	CACNA2D1	25.857
18beta-glycyrrhetinic acid	8912	CACNA1H	25.857
18beta-glycyrrhetinic acid	778	CACNA1F	25.857
18beta-glycyrrhetinic acid	773	CACNA1A	25.857
18beta-glycyrrhetinic acid	8911	CACNA1I	25.857
18beta-glycyrrhetinic acid	9254	CACNA2D2	25.857
18beta-glycyrrhetinic acid	6462	SHBG	25.857
18beta-glycyrrhetinic acid	779	CACNA1S	25.857
18beta-glycyrrhetinic acid	55799	CACNA2D3	25.857
18beta-glycyrrhetinic acid	785	CACNB4	25.857
18beta-glycyrrhetinic acid	774	CACNA1B	25.857
18beta-glycyrrhetinic acid	775	CACNA1C	25.857
18beta-glycyrrhetinic acid	1584	CYP11B1	25.857
18beta-glycyrrhetinic acid	776	CACNA1D	25.857
18beta-glycyrrhetinic acid	784	CACNB3	25.857
18beta-glycyrrhetinic acid	1585	CYP11B2	25.857
18beta-glycyrrhetinic acid	8913	CACNA1G	25.857
18beta-glycyrrhetinic acid	783	CACNB2	25.857
18beta-glycyrrhetinic acid	786	CACNG1	25.857
3-octanol	162514	TRPV3	122.778
3-octanol	4986	OPRK1	122.778
3-octanol	79054	TRPM8	122.778
3-octanol	8989	TRPA1	122.778
3-octanol	50801	KCNK4	55.444
3-octanol	11280	SCN11A	48
3-octanol	6327	SCN2B	48
3-octanol	18	ABAT	48
3-octanol	6323	SCN1A	48
3-octanol	55800	SCN3B	48
3-octanol	6328	SCN3A	48
3-octanol	6332	SCN7A	48
3-octanol	6331	SCN5A	48
3-octanol	6336	SCN10A	48
3-octanol	6718	AKR1D1	48
3-octanol	7915	ALDH5A1	48
3-octanol	6326	SCN2A	48
3-octanol	9734	HDAC9	48
3-octanol	7299	TYR	48
3-octanol	6335	SCN9A	48
3-octanol	6329	SCN4A	48
3-octanol	6330	SCN4B	48
3-octanol	6716	SRD5A2	48
3-octanol	36	ACADSB	48
3-octanol	6334	SCN8A	48
3-octanol	6324	SCN1B	48
3-octanol	4967	OGDH	48
3-octanol	3066	HDAC2	48
3-octanol	89	ACTN3	22.373
3-octanol	6863	TAC1	22.373
3-octanol	4804	NGFR	22.373
3-octanol	150	ADRA2A	22.373
3-octanol	7442	TRPV1	22.373
3-octanol	2255	FGF10	22.373
3-octanol	7415	VCP	22.373
3-octanol	3091	HIF1A	22.373
3-octanol	664	BNIP3	22.373
3-octanol	1392	CRH	22.373
3-octanol	4747	NEFL	22.373
3-octanol	90226	UCN2	22.373
3-octanol	6608	SMO	22.373
3-octanol	6865	TACR2	22.373
3-octanol	358	AQP1	22.373
3-octanol	255061	TAC4	22.373
3-octanol	1001	CDH3	22.373
3-octanol	863	CBFA2T3	22.373
3-octanol	4744	NEFH	22.373
3-octanol	1395	CRHR2	22.373
3,4-dehydrolycopen-16-al	43	ACHE	80.882
3,4-dehydrolycopen-16-al	590	BCHE	80.882
3,4-dehydrolycopen-16-al	8292	COLQ	55.444
3,4-dehydrolycopen-16-al	60482	SLC5A7	22.373
3,4-dehydrolycopen-16-al	3084	NRG1	22.373
3,4-dehydrolycopen-16-al	29958	DMGDH	22.373
3,4-dehydrolycopen-16-al	6496	SIX3	22.373
3,4-dehydrolycopen-16-al	1401	CRP	22.373
3,4-dehydrolycopen-16-al	8492	PRSS12	22.373
3,4-dehydrolycopen-16-al	80736	SLC44A4	22.373
3,4-dehydrolycopen-16-al	501	ALDH7A1	22.373
3,4-dehydrolycopen-16-al	26052	DNM3	22.373
3,4-dehydrolycopen-16-al	429	ASCL1	22.373
3,4-dehydrolycopen-16-al	133121	ENPP6	22.373
3,4-dehydrolycopen-16-al	1006	CDH8	22.373
3,4-dehydrolycopen-16-al	2339	FNTA	22.373
3,4-dehydrolycopen-16-al	375790	AGRN	22.373
3,4-dehydrolycopen-16-al	1119	CHKA	22.373
3,4-dehydrolycopen-16-al	55349	CHDH	22.373
3,4-dehydrolycopen-16-al	2902	GRIN1	22.373
3,7-dimethyl-7-octenal	43	ACHE	80.882
3,7-dimethyl-7-octenal	590	BCHE	80.882
3,7-dimethyl-7-octenal	8292	COLQ	55.444
3,7-dimethyl-7-octenal	60482	SLC5A7	22.373
3,7-dimethyl-7-octenal	3084	NRG1	22.373
3,7-dimethyl-7-octenal	29958	DMGDH	22.373
3,7-dimethyl-7-octenal	6496	SIX3	22.373
3,7-dimethyl-7-octenal	1401	CRP	22.373
3,7-dimethyl-7-octenal	8492	PRSS12	22.373
3,7-dimethyl-7-octenal	80736	SLC44A4	22.373
3,7-dimethyl-7-octenal	501	ALDH7A1	22.373
3,7-dimethyl-7-octenal	26052	DNM3	22.373
3,7-dimethyl-7-octenal	429	ASCL1	22.373
3,7-dimethyl-7-octenal	133121	ENPP6	22.373
3,7-dimethyl-7-octenal	1006	CDH8	22.373
3,7-dimethyl-7-octenal	2339	FNTA	22.373
3,7-dimethyl-7-octenal	375790	AGRN	22.373
3,7-dimethyl-7-octenal	1119	CHKA	22.373
3,7-dimethyl-7-octenal	55349	CHDH	22.373
3,7-dimethyl-7-octenal	2902	GRIN1	22.373
acanthoside b	7153	TOP2A	48
acanthoside b	7155	TOP2B	48
aconitine	6531	SLC6A3	48
aconitine	11280	SCN11A	48
aconitine	1131	CHRM3	48
aconitine	1128	CHRM1	48
aconitine	6331	SCN5A	48
aconitine	6336	SCN10A	48
aconitine	1133	CHRM5	48
aconitine	6532	SLC6A4	48
aconitine	3269	HRH1	48
aconitine	1129	CHRM2	48
aconitine	1132	CHRM4	48
aconitine	6530	SLC6A2	48
aconitine	5742	PTGS1	26.373
aconitine	5743	PTGS2	26.373
alpha-limonene	3750	KCND1	80.882
alpha-limonene	3738	KCNA3	80.882
alpha-limonene	5564	PRKAB1	80.882
alpha-limonene	124	ADH1A	80.882
alpha-limonene	3744	KCNA10	80.882
alpha-limonene	2593	GAMT	80.882
alpha-limonene	3748	KCNC3	80.882
alpha-limonene	3736	KCNA1	80.882
alpha-limonene	3737	KCNA2	80.882
alpha-limonene	7173	TPO	80.882
alpha-limonene	847	CAT	80.882
alpha-limonene	3745	KCNB1	80.882
alpha-limonene	125	ADH1B	80.882
alpha-limonene	1742	DLG4	80.882
alpha-limonene	3747	KCNC2	80.882
alpha-limonene	3746	KCNC1	80.882
alpha-limonene	126	ADH1C	80.882
alpha-limonene	9312	KCNB2	80.882
alpha-limonene	3741	KCNA5	80.882
alpha-limonene	6035	RNASE1	80.882
alpha-limonene	3751	KCND2	80.882
alpha-limonene	217	ALDH2	80.882
alpha-limonene	3739	KCNA4	80.882
alpha-limonene	3743	KCNA7	80.882
alpha-limonene	3742	KCNA6	80.882
alpha-limonene	3752	KCND3	80.882
alpha-limonene	2983	GUCY1B3	55.444
alpha-limonene	2628	GATM	55.444
alpha-limonene	50801	KCNK4	55.444
alpha-limonene	389434	IYD	55.444
alpha-limonene	3784	KCNQ1	55.444
alpha-limonene	1586	CYP17A1	48
alpha-limonene	2099	ESR1	48
alpha-limonene	5241	PGR	48
alpha-limonene	4986	OPRK1	48
alpha-limonene	4306	NR3C2	48
alpha-limonene	2203	FBP1	22.373
alpha-limonene	9162	DGKI	22.373
alpha-limonene	131	ADH7	22.373
alpha-limonene	4781	NFIB	22.373
alpha-limonene	114757	CYGB	22.373
alpha-limonene	9369	NRXN3	22.373
alpha-limonene	94030	LRRC4B	22.373
alpha-limonene	343	AQP8	22.373
alpha-limonene	170302	ARX	22.373
alpha-limonene	3479	IGF1	22.373
alpha-limonene	85358	SHANK3	22.373
alpha-limonene	91703	ACY3	22.373
alpha-limonene	443	ASPA	22.373
alpha-limonene	9378	NRXN1	22.373
benzyl alcohol	8654	PDE5A	80.882
benzyl alcohol	5141	PDE4A	80.882
benzyl alcohol	10846	PDE10A	80.882
benzyl alcohol	100	ADA	80.882
benzyl alcohol	55846	ITFG2	55.444
benzyl alcohol	1716	DGUOK	55.444
benzyl alcohol	7498	XDH	55.444
benzyl alcohol	134	ADORA1	55.444
benzyl alcohol	5152	PDE9A	22.373
benzyl alcohol	4521	NUDT1	22.373
benzyl alcohol	972	CD74	22.373
benzyl alcohol	2987	GUK1	22.373
benzyl alcohol	5139	PDE3A	22.373
benzyl alcohol	22933	SIRT2	22.373
benzyl alcohol	4282	MIF	22.373
benzyl alcohol	6900	CNTN2	22.373
benzyl alcohol	1806	DPYD	22.373
benzyl alcohol	8741	TNFSF13	22.373
benzyl alcohol	132	ADK	22.373
benzyl alcohol	3704	ITPA	22.373
benzyl alcohol	5294	PIK3CG	22.373
benzyl alcohol	5631	PRPS1	22.373
benzyl alcohol	51816	CECR1	22.373
benzyl alcohol	8915	BCL10	22.373
benzyl alcohol	156	ADRBK1	22.373
benzyl alcohol	4860	PNP	22.373
benzyl alcohol	353	APRT	22.373
benzyl alcohol	6790	AURKA	22.373
benzyl alcohol	51738	GHRL	22.373
benzyl alcohol	1813	DRD2	22.373
benzyl alcohol	5153	PDE1B	22.373
benzyl alcohol	25939	SAMHD1	22.373
benzyl alcohol	51071	DERA	22.373
benzyl alcohol	10673	TNFSF13B	22.373
benzyl alcohol	1392	CRH	22.373
benzyl alcohol	477	ATP1A2	22.373
benzyl alcohol	115650	TNFRSF13C	22.373
benzyl alcohol	487	ATP2A1	22.373
benzyl alcohol	161823	ADAL	22.373
benzyl alcohol	55	ACPP	22.373
benzyl alcohol	10724	MGEA5	22.373
benzyl alcohol	1812	DRD1	22.373
benzyl alcohol	5138	PDE2A	22.373
benzyl alcohol	131870	NUDT16	22.373
benzyl alcohol	3251	HPRT1	22.373
benzyl alcohol	55270	NUDT15	22.373
benzyl alcohol	50940	PDE11A	22.373
beta-phellandrene	3750	KCND1	80.882
beta-phellandrene	3738	KCNA3	80.882
beta-phellandrene	5564	PRKAB1	80.882
beta-phellandrene	124	ADH1A	80.882
beta-phellandrene	3744	KCNA10	80.882
beta-phellandrene	2593	GAMT	80.882
beta-phellandrene	3748	KCNC3	80.882
beta-phellandrene	3736	KCNA1	80.882
beta-phellandrene	3737	KCNA2	80.882
beta-phellandrene	7173	TPO	80.882
beta-phellandrene	847	CAT	80.882
beta-phellandrene	3745	KCNB1	80.882
beta-phellandrene	125	ADH1B	80.882
beta-phellandrene	1742	DLG4	80.882
beta-phellandrene	3747	KCNC2	80.882
beta-phellandrene	3746	KCNC1	80.882
beta-phellandrene	126	ADH1C	80.882
beta-phellandrene	9312	KCNB2	80.882
beta-phellandrene	3741	KCNA5	80.882
beta-phellandrene	6035	RNASE1	80.882
beta-phellandrene	3751	KCND2	80.882
beta-phellandrene	217	ALDH2	80.882
beta-phellandrene	3739	KCNA4	80.882
beta-phellandrene	3743	KCNA7	80.882
beta-phellandrene	3742	KCNA6	80.882
beta-phellandrene	3752	KCND3	80.882
beta-phellandrene	2983	GUCY1B3	55.444
beta-phellandrene	2628	GATM	55.444
beta-phellandrene	50801	KCNK4	55.444
beta-phellandrene	389434	IYD	55.444
beta-phellandrene	3784	KCNQ1	55.444
beta-phellandrene	51109	RDH11	48
beta-phellandrene	5949	RBP3	48
beta-phellandrene	54884	RETSAT	48
beta-phellandrene	112724	RDH13	48
beta-phellandrene	9249	DHRS3	48
beta-phellandrene	5959	RDH5	48
beta-phellandrene	2099	ESR1	48
beta-phellandrene	5241	PGR	48
beta-phellandrene	220	ALDH1A3	48
beta-phellandrene	145226	RDH12	48
beta-phellandrene	10901	DHRS4	48
beta-phellandrene	5947	RBP1	48
beta-phellandrene	216	ALDH1A1	48
beta-phellandrene	6017	RLBP1	48
beta-phellandrene	57665	RDH14	48
beta-phellandrene	50700	RDH8	48
beta-phellandrene	9227	LRAT	48
beta-phellandrene	8854	ALDH1A2	48
beta-phellandrene	2203	FBP1	22.373
calcium carbonate	2224	FDPS	122.778
calcium phosphate	782	CACNB1	36.688
calcium phosphate	781	CACNA2D1	36.688
calcium phosphate	6558	SLC12A2	36.688
calcium phosphate	10723	SLC12A7	36.688
calcium phosphate	57468	SLC12A5	36.688
calcium phosphate	779	CACNA1S	36.688
calcium phosphate	775	CACNA1C	36.688
calcium phosphate	9990	SLC12A6	36.688
calcium phosphate	6557	SLC12A1	36.688
calcium phosphate	783	CACNB2	36.688
calcium phosphate	6560	SLC12A4	36.688
calcium phosphate	786	CACNG1	36.688
carvacrol	2555	GABRA2	80.882
carvacrol	2563	GABRD	80.882
carvacrol	5139	PDE3A	80.882
carvacrol	2560	GABRB1	80.882
carvacrol	2567	GABRG3	80.882
carvacrol	7124	TNF	80.882
carvacrol	2564	GABRE	80.882
carvacrol	6326	SCN2A	80.882
carvacrol	2556	GABRA3	80.882
carvacrol	2565	GABRG1	80.882
carvacrol	2568	GABRP	80.882
carvacrol	2557	GABRA4	80.882
carvacrol	2561	GABRB2	80.882
carvacrol	43	ACHE	80.882
carvacrol	6329	SCN4A	80.882
carvacrol	55879	GABRQ	80.882
carvacrol	2562	GABRB3	80.882
carvacrol	2558	GABRA5	80.882
carvacrol	2559	GABRA6	80.882
carvacrol	2554	GABRA1	80.882
carvacrol	5142	PDE4B	80.882
carvacrol	590	BCHE	80.882
carvacrol	2566	GABRG2	80.882
carvacrol	5140	PDE3B	55.444
carvacrol	5144	PDE4D	55.444
carvacrol	8292	COLQ	55.444
carvacrol	4049	LTA	55.444
carvacrol	6256	RXRA	55.444
carvacrol	6531	SLC6A3	48
carvacrol	1813	DRD2	48
carvacrol	6532	SLC6A4	48
carvacrol	1815	DRD4	48
carvacrol	3363	HTR7	48
carvacrol	3350	HTR1A	48
carvacrol	1621	DBH	48
carvacrol	1814	DRD3	48
carvacrol	240	ALOX5	48
carvacrol	1816	DRD5	48
carvacrol	1812	DRD1	48
carvacrol	6530	SLC6A2	48
carvacrol	6323	SCN1A	23
carvacrol	6328	SCN3A	23
carvacrol	8091	HMGA2	22.373
carvacrol	8654	PDE5A	22.373
carvacrol	336	APOA2	22.373
carvacrol	60482	SLC5A7	22.373
carvacrol	10507	SEMA4D	22.373
carvacrol	3084	NRG1	22.373
carvacrol	972	CD74	22.373
carvacrol	3263	HPX	22.373
carvacrol acetate	6336	SCN10A	80.882
carvacrol acetate	43	ACHE	80.882
carvacrol acetate	590	BCHE	80.882
carvacrol acetate	8292	COLQ	55.444
carvacrol acetate	60482	SLC5A7	22.373
carvacrol acetate	3084	NRG1	22.373
carvacrol acetate	29958	DMGDH	22.373
carvacrol acetate	6496	SIX3	22.373
carvacrol acetate	287	ANK2	22.373
carvacrol acetate	1401	CRP	22.373
carvacrol acetate	6331	SCN5A	22.373
carvacrol acetate	8492	PRSS12	22.373
carvacrol acetate	80736	SLC44A4	22.373
carvacrol acetate	501	ALDH7A1	22.373
carvacrol acetate	26052	DNM3	22.373
carvacrol acetate	6330	SCN4B	22.373
carvacrol acetate	429	ASCL1	22.373
carvacrol acetate	133121	ENPP6	22.373
carvacrol acetate	1006	CDH8	22.373
carvacrol acetate	3741	KCNA5	22.373
carvacrol acetate	2339	FNTA	22.373
carvacrol acetate	375790	AGRN	22.373
carvacrol acetate	1119	CHKA	22.373
carvacrol acetate	6262	RYR2	22.373
carvacrol acetate	55349	CHDH	22.373
carvacrol acetate	2702	GJA5	22.373
carvacrol acetate	2902	GRIN1	22.373
citronellal	43	ACHE	80.882
citronellal	590	BCHE	80.882
citronellal	8292	COLQ	55.444
citronellal	2161	F12	48
citronellal	60482	SLC5A7	22.373
citronellal	3084	NRG1	22.373
citronellal	29958	DMGDH	22.373
citronellal	6496	SIX3	22.373
citronellal	1401	CRP	22.373
citronellal	8492	PRSS12	22.373
citronellal	80736	SLC44A4	22.373
citronellal	501	ALDH7A1	22.373
citronellal	26052	DNM3	22.373
citronellal	429	ASCL1	22.373
citronellal	133121	ENPP6	22.373
citronellal	1006	CDH8	22.373
citronellal	2339	FNTA	22.373
citronellal	375790	AGRN	22.373
citronellal	1119	CHKA	22.373
citronellal	55349	CHDH	22.373
citronellal	2902	GRIN1	22.373
citronellol	51109	RDH11	80.882
citronellol	5949	RBP3	80.882
citronellol	54884	RETSAT	80.882
citronellol	112724	RDH13	80.882
citronellol	9249	DHRS3	80.882
citronellol	5959	RDH5	80.882
citronellol	220	ALDH1A3	80.882
citronellol	145226	RDH12	80.882
citronellol	10901	DHRS4	80.882
citronellol	5947	RBP1	80.882
citronellol	216	ALDH1A1	80.882
citronellol	6017	RLBP1	80.882
citronellol	57665	RDH14	80.882
citronellol	50700	RDH8	80.882
citronellol	9227	LRAT	80.882
citronellol	8854	ALDH1A2	80.882
citronellol	218	ALDH3A1	55.444
citronellol	6010	RHO	55.444
citronellol	6247	RS1	55.444
citronellol	2161	F12	48
citronellol	2099	ESR1	48
citronellol	5241	PGR	48
citronellol	1512	CTSH	22.373
citronellol	94233	OPN4	22.373
citronellol	157506	RDH10	22.373
citronellol	64577	ALDH8A1	22.373
citronellol	6462	SHBG	22.373
citronellol	10202	DHRS2	22.373
citronellol	51478	HSD17B7	22.373
citronellol	367	AR	22.373
citronellol	7067	THRA	22.373
citronellol	5076	PAX2	22.373
citronellol	874	CBR3	22.373
citronellol	2625	GATA3	22.373
citronellol	429	ASCL1	22.373
citronellol	1749	DLX5	22.373
citronellol	5979	RET	22.373
citronellol	7068	THRB	22.373
citronellol	1428	CRYM	22.373
citronellol	706	TSPO	22.373
citronellol	221391	OPN5	22.373
citronellol	10170	DHRS9	22.373
citronellol	873	CBR1	22.373
citronellol	1543	CYP1A1	22.373
citronellyl acetate	2099	ESR1	48
citronellyl acetate	5241	PGR	48
citronellyl acetate	367	AR	48
citronellyl acetate	4306	NR3C2	48
cryptoxanthin monoepoxide	100	ADA	23
cryptoxanthin monoepoxide	55846	ITFG2	22.373
cryptoxanthin monoepoxide	1716	DGUOK	22.373
cryptoxanthin monoepoxide	7498	XDH	22.373
cryptoxanthin monoepoxide	134	ADORA1	22.373
d-limonene	3750	KCND1	80.882
d-limonene	3738	KCNA3	80.882
d-limonene	5564	PRKAB1	80.882
d-limonene	124	ADH1A	80.882
d-limonene	3744	KCNA10	80.882
d-limonene	2593	GAMT	80.882
d-limonene	3748	KCNC3	80.882
d-limonene	3736	KCNA1	80.882
d-limonene	3737	KCNA2	80.882
d-limonene	7173	TPO	80.882
d-limonene	847	CAT	80.882
d-limonene	3745	KCNB1	80.882
d-limonene	125	ADH1B	80.882
d-limonene	1742	DLG4	80.882
d-limonene	3747	KCNC2	80.882
d-limonene	3746	KCNC1	80.882
d-limonene	126	ADH1C	80.882
d-limonene	9312	KCNB2	80.882
d-limonene	3741	KCNA5	80.882
d-limonene	6035	RNASE1	80.882
d-limonene	3751	KCND2	80.882
d-limonene	217	ALDH2	80.882
d-limonene	3739	KCNA4	80.882
d-limonene	3743	KCNA7	80.882
d-limonene	3742	KCNA6	80.882
d-limonene	3752	KCND3	80.882
d-limonene	2983	GUCY1B3	55.444
d-limonene	2628	GATM	55.444
d-limonene	50801	KCNK4	55.444
d-limonene	389434	IYD	55.444
d-limonene	3784	KCNQ1	55.444
d-limonene	1586	CYP17A1	48
d-limonene	2099	ESR1	48
d-limonene	5241	PGR	48
d-limonene	4986	OPRK1	48
d-limonene	4306	NR3C2	48
d-limonene	2203	FBP1	22.373
d-limonene	9162	DGKI	22.373
d-limonene	131	ADH7	22.373
d-limonene	4781	NFIB	22.373
d-limonene	114757	CYGB	22.373
d-limonene	9369	NRXN3	22.373
d-limonene	94030	LRRC4B	22.373
d-limonene	343	AQP8	22.373
d-limonene	170302	ARX	22.373
d-limonene	3479	IGF1	22.373
d-limonene	85358	SHANK3	22.373
d-limonene	91703	ACY3	22.373
d-limonene	443	ASPA	22.373
d-limonene	9378	NRXN1	22.373
decanal	11280	SCN11A	48
decanal	6327	SCN2B	48
decanal	18	ABAT	48
decanal	6323	SCN1A	48
decanal	55800	SCN3B	48
decanal	6328	SCN3A	48
decanal	6332	SCN7A	48
decanal	6331	SCN5A	48
decanal	6336	SCN10A	48
decanal	6718	AKR1D1	48
decanal	7915	ALDH5A1	48
decanal	6326	SCN2A	48
decanal	9734	HDAC9	48
decanal	7299	TYR	48
decanal	6335	SCN9A	48
decanal	6329	SCN4A	48
decanal	6330	SCN4B	48
decanal	6716	SRD5A2	48
decanal	36	ACADSB	48
decanal	6334	SCN8A	48
decanal	6324	SCN1B	48
decanal	4967	OGDH	48
decanal	3066	HDAC2	48
decanal	43	ACHE	8.253
decanal	590	BCHE	8.253
decanal	781	CACNA2D1	5.785
decanal	5327	PLAT	5.785
decanal	2104	ESRRG	5.785
decanal	1345	COX6C	5.785
decanal	1329	COX5B	5.785
decanal	1350	COX7C	5.785
decanal	4512	COX1	5.785
decanal	773	CACNA1A	5.785
decanal	1646	AKR1C2	5.785
decanal	116444	GRIN3B	5.785
decanal	9254	CACNA2D2	5.785
decanal	2903	GRIN2A	5.785
decanal	9377	COX5A	5.785
decanal	4514	COX3	5.785
decanal	367	AR	5.785
decanal	1346	COX7A1	5.785
decanal	2235	FECH	5.785
decanal	5340	PLG	5.785
decanal	1327	COX4I1	5.785
decanal	5319	PLA2G1B	5.785
decanal	1339	COX6A2	5.785
decanal	774	CACNA1B	5.785
decanal	2905	GRIN2C	5.785
decanal	2904	GRIN2B	5.785
decanal	126	ADH1C	5.785
delta-terpineol	2099	ESR1	80.882
delta-terpineol	5241	PGR	80.882
delta-terpineol	54361	WNT4	55.444
delta-terpineol	162514	TRPV3	48
delta-terpineol	4986	OPRK1	48
delta-terpineol	79054	TRPM8	48
delta-terpineol	8989	TRPA1	48
delta-terpineol	7022	TFAP2C	22.373
delta-terpineol	8600	TNFSF11	22.373
delta-terpineol	5245	PHB	22.373
delta-terpineol	27324	TOX3	22.373
delta-terpineol	7040	TGFB1	22.373
delta-terpineol	5469	MED1	22.373
delta-terpineol	4824	NKX3-1	22.373
delta-terpineol	2100	ESR2	22.373
delta-terpineol	4734	NEDD4	22.373
delta-terpineol	6469	SHH	22.373
delta-terpineol	6317	SERPINB3	22.373
delta-terpineol	51176	LEF1	22.373
delta-terpineol	2263	FGFR2	22.373
delta-terpineol	6714	SRC	22.373
delta-terpineol	51366	UBR5	22.373
delta-terpineol	374	AREG	22.373
delta-terpineol	947	CD34	22.373
delta-terpineol	2852	GPER1	22.373
delta-terpineol	7474	WNT5A	22.373
delta-terpineol	6662	SOX9	22.373
delta-terpineol	5155	PDGFB	22.373
delta-terpineol	7421	VDR	22.373
delta-terpineol	8805	TRIM24	22.373
erythraline	3356	HTR2A	23
erythraline	1128	CHRM1	23
erythraline	3357	HTR2B	23
erythraline	3358	HTR2C	23
erythraline	1813	DRD2	23
erythraline	4128	MAOA	23
erythraline	6532	SLC6A4	23
erythraline	43	ACHE	23
erythraline	1812	DRD1	23
erythraline	1788	DNMT3A	22.373
erythraline	6570	SLC18A1	22.373
erythraline	51286	CEND1	22.373
erythraline	8292	COLQ	22.373
erythraline	1268	CNR1	22.373
erythraline	1816	DRD5	22.373
erythraline	590	BCHE	22.373
erythraline	947	CD34	22.373
gamma-sitosterol	2099	ESR1	122.778
gamma-sitosterol	5241	PGR	122.778
gamma-sitosterol	7421	VDR	80.882
gamma-sitosterol	1594	CYP27B1	80.882
gamma-sitosterol	2638	GC	55.444
gamma-sitosterol	22938	SNW1	55.444
gamma-sitosterol	367	AR	48
gamma-sitosterol	2908	NR3C1	48
gamma-sitosterol	4790	NFKB1	22.373
gamma-sitosterol	8644	AKR1C3	22.373
gamma-sitosterol	1591	CYP24A1	22.373
gamma-sitosterol	151306	GPBAR1	22.373
gamma-sitosterol	6591	SNAI2	22.373
gamma-sitosterol	5469	MED1	22.373
gamma-sitosterol	6615	SNAI1	22.373
gamma-sitosterol	1576	CYP3A4	22.373
gamma-sitosterol	793	CALB1	22.373
gamma-sitosterol	8074	FGF23	22.373
gamma-sitosterol	2672	GFI1	22.373
gamma-sitosterol	55915	LANCL2	22.373
gamma-sitosterol	54361	WNT4	22.373
gamma-sitosterol	6929	TCF3	22.373
gamma-sitosterol	581	BAX	22.373
gamma-sitosterol	9365	KL	22.373
gamma-sitosterol	120227	CYP2R1	22.373
gamma-sitosterol	5371	PML	22.373
gamma-sitosterol	2683	B4GALT1	22.373
gamma-sitosterol	795	S100G	22.373
gamma-sitosterol	1593	CYP27A1	22.373
gamma-sitosterol	25959	KANK2	22.373
gamma-sitosterol	10265	IRX5	22.373
gamma-sitosterol	6256	RXRA	22.373
gamma-sitosterol	9971	NR1H4	22.373
gamma-sitosterol	8805	TRIM24	22.373
glycyrrhetinic acid	367	AR	122.778
glycyrrhetinic acid	2908	NR3C1	122.778
glycyrrhetinic acid	301	ANXA1	122.778
glycyrrhetinic acid	5731	PTGER1	80.882
glycyrrhetinic acid	5734	PTGER4	80.882
glycyrrhetinic acid	5732	PTGER2	80.882
glycyrrhetinic acid	5733	PTGER3	80.882
glycyrrhetinic acid	11314	CD300A	55.444
glycyrrhetinic acid	9928	KIF14	55.444
glycyrrhetinic acid	6715	SRD5A1	48
glycyrrhetinic acid	1586	CYP17A1	48
glycyrrhetinic acid	6546	SLC8A1	48
glycyrrhetinic acid	2161	F12	48
glycyrrhetinic acid	5618	PRLR	48
glycyrrhetinic acid	2099	ESR1	48
glycyrrhetinic acid	7442	TRPV1	48
glycyrrhetinic acid	5468	PPARG	48
glycyrrhetinic acid	2864	FFAR1	48
glycyrrhetinic acid	5241	PGR	48
glycyrrhetinic acid	4986	OPRK1	48
glycyrrhetinic acid	9415	FADS2	48
glycyrrhetinic acid	3992	FADS1	48
glycyrrhetinic acid	5467	PPARD	48
glycyrrhetinic acid	5742	PTGS1	48
glycyrrhetinic acid	2182	ACSL4	48
glycyrrhetinic acid	5743	PTGS2	48
glycyrrhetinic acid	6785	ELOVL4	48
glycyrrhetinic acid	3290	HSD11B1	48
glycyrrhetinic acid	2181	ACSL3	48
glycyrrhetinic acid	4306	NR3C2	48
glycyrrhetinic acid	23604	DAPK2	22.373
glycyrrhetinic acid	3248	HPGD	22.373
glycyrrhetinic acid	101	ADAM8	22.373
glycyrrhetinic acid	6369	CCL24	22.373
glycyrrhetinic acid	3565	IL4	22.373
glycyrrhizin	2908	NR3C1	48
glycyrrhizin	476	ATP1A1	48
hesperidin	6646	SOAT1	48
hesperidin	4547	MTTP	48
hesperidin	8435	SOAT2	48
hesperidin	3360	HTR4	26.373
hesperidin	3356	HTR2A	26.373
hesperidin	154	ADRB2	26.373
hesperidin	2100	ESR2	26.373
hesperidin	2099	ESR1	26.373
hesperidin	153	ADRB1	26.373
hesperidin	8856	NR1I2	26.373
hesperidin	3757	KCNH2	26.373
hesperidin	3359	HTR3A	26.373
hesperidin	7421	VDR	26.373
higenamine	3356	HTR2A	48
higenamine	1131	CHRM3	48
higenamine	3357	HTR2B	48
higenamine	150	ADRA2A	48
higenamine	3351	HTR1B	48
higenamine	3358	HTR2C	48
higenamine	3352	HTR1D	48
higenamine	1813	DRD2	48
higenamine	43	ACHE	48
higenamine	6571	SLC18A2	48
higenamine	1815	DRD4	48
higenamine	1135	CHRNA2	48
higenamine	3350	HTR1A	48
higenamine	152	ADRA2C	48
higenamine	50632	CALY	48
higenamine	1814	DRD3	48
higenamine	1816	DRD5	48
higenamine	3359	HTR3A	48
higenamine	1812	DRD1	48
higenamine	590	BCHE	48
higenamine	1129	CHRM2	48
higenamine	151	ADRA2B	48
higenamine	154	ADRB2	23
higenamine	153	ADRB1	23
higenamine	409	ARRB2	22.373
higenamine	7879	RAB7A	22.373
higenamine	10241	CALCOCO2	22.373
hypaconitine	6531	SLC6A3	48
hypaconitine	11280	SCN11A	48
hypaconitine	1128	CHRM1	48
hypaconitine	6331	SCN5A	48
hypaconitine	6336	SCN10A	48
hypaconitine	6532	SLC6A4	48
hypaconitine	1129	CHRM2	48
hypaconitine	6530	SLC6A2	48
isopropenyl toluene b	6337	SCNN1A	80.882
isopropenyl toluene b	3764	KCNJ8	80.882
isopropenyl toluene b	148	ADRA1A	80.882
isopropenyl toluene b	6323	SCN1A	80.882
isopropenyl toluene b	6340	SCNN1G	80.882
isopropenyl toluene b	3356	HTR2A	80.882
isopropenyl toluene b	154	ADRB2	80.882
isopropenyl toluene b	32	ACACB	80.882
isopropenyl toluene b	4507	MTAP	80.882
isopropenyl toluene b	150	ADRA2A	80.882
isopropenyl toluene b	51311	TLR8	80.882
isopropenyl toluene b	153	ADRB1	80.882
isopropenyl toluene b	353	APRT	80.882
isopropenyl toluene b	146	ADRA1D	80.882
isopropenyl toluene b	55825	PECR	80.882
isopropenyl toluene b	3269	HRH1	80.882
isopropenyl toluene b	5562	PRKAA1	80.882
isopropenyl toluene b	3363	HTR7	80.882
isopropenyl toluene b	3274	HRH2	80.882
isopropenyl toluene b	147	ADRA1B	80.882
isopropenyl toluene b	6339	SCNN1D	80.882
isopropenyl toluene b	152	ADRA2C	80.882
isopropenyl toluene b	8639	AOC3	80.882
isopropenyl toluene b	5033	P4HA1	80.882
isopropenyl toluene b	6733	SRPK2	80.882
isopropenyl toluene b	51284	TLR7	80.882
isopropenyl toluene b	3758	KCNJ1	80.882
isopropenyl toluene b	185	AGTR1	80.882
isopropenyl toluene b	155	ADRB3	80.882
isopropenyl toluene b	52	ACP1	80.882
isopropenyl toluene b	6338	SCNN1B	80.882
isopropenyl toluene b	1555	CYP2B6	80.882
isopropenyl toluene b	151	ADRA2B	80.882
isopropenyl toluene b	6530	SLC6A2	80.882
isopropenyl toluene b	158297	SAXO1	55.444
isopropenyl toluene b	6343	SCT	55.444
isopropenyl toluene b	7357	UGCG	55.444
isopropenyl toluene b	5261	PHKG2	55.444
isopropenyl toluene b	333	APLP1	55.444
isopropenyl toluene b	132	ADK	55.444
isopropenyl toluene b	31	ACACA	55.444
isopropenyl toluene b	1139	CHRNA7	55.444
isopropenyl toluene b	4860	PNP	55.444
isopropenyl toluene b	409	ARRB2	55.444
isopropenyl toluene b	7879	RAB7A	55.444
isopropenyl toluene b	5563	PRKAA2	55.444
isopropenyl toluene b	3358	HTR2C	55.444
isopropenyl toluene b	3326	HSP90AB1	55.444
isopropenyl toluene b	224	ALDH3A2	55.444
isopropenyl toluene b	3630	INS	55.444
isosinomenine	2100	ESR2	80.882
isosinomenine	4985	OPRD1	80.882
isosinomenine	2099	ESR1	80.882
isosinomenine	4986	OPRK1	80.882
isosinomenine	4988	OPRM1	80.882
isosinomenine	6469	SHH	22.373
isosinomenine	2263	FGFR2	22.373
isosinomenine	4747	NEFL	22.373
isosinomenine	79971	WLS	22.373
isosinomenine	4744	NEFH	22.373
kaempferol	3292	HSD17B1	26.373
kaempferol	1429	CRYZ	23
kaempferol	79001	VKORC1	23
kaempferol	1728	NQO1	23
linalool	2099	ESR1	80.882
linalool	5241	PGR	80.882
linalool	54361	WNT4	55.444
linalool	7022	TFAP2C	22.373
linalool	8600	TNFSF11	22.373
linalool	5245	PHB	22.373
linalool	27324	TOX3	22.373
linalool	7040	TGFB1	22.373
linalool	5469	MED1	22.373
linalool	4824	NKX3-1	22.373
linalool	2100	ESR2	22.373
linalool	4734	NEDD4	22.373
linalool	6469	SHH	22.373
linalool	6317	SERPINB3	22.373
linalool	51176	LEF1	22.373
linalool	2263	FGFR2	22.373
linalool	6714	SRC	22.373
linalool	51366	UBR5	22.373
linalool	374	AREG	22.373
linalool	947	CD34	22.373
linalool	2852	GPER1	22.373
linalool	7474	WNT5A	22.373
linalool	6662	SOX9	22.373
linalool	5155	PDGFB	22.373
linalool	7421	VDR	22.373
linalool	8805	TRIM24	22.373
mesaconitine	6531	SLC6A3	48
mesaconitine	11280	SCN11A	48
mesaconitine	1128	CHRM1	48
mesaconitine	6331	SCN5A	48
mesaconitine	6336	SCN10A	48
mesaconitine	6532	SLC6A4	48
mesaconitine	3269	HRH1	48
mesaconitine	1129	CHRM2	48
mesaconitine	6530	SLC6A2	48
myrcene	3750	KCND1	80.882
myrcene	3738	KCNA3	80.882
myrcene	5564	PRKAB1	80.882
myrcene	124	ADH1A	80.882
myrcene	3744	KCNA10	80.882
myrcene	2593	GAMT	80.882
myrcene	3748	KCNC3	80.882
myrcene	3736	KCNA1	80.882
myrcene	3737	KCNA2	80.882
myrcene	7173	TPO	80.882
myrcene	847	CAT	80.882
myrcene	3745	KCNB1	80.882
myrcene	125	ADH1B	80.882
myrcene	1742	DLG4	80.882
myrcene	3747	KCNC2	80.882
myrcene	3746	KCNC1	80.882
myrcene	126	ADH1C	80.882
myrcene	9312	KCNB2	80.882
myrcene	3741	KCNA5	80.882
myrcene	6035	RNASE1	80.882
myrcene	3751	KCND2	80.882
myrcene	217	ALDH2	80.882
myrcene	3739	KCNA4	80.882
myrcene	3743	KCNA7	80.882
myrcene	3742	KCNA6	80.882
myrcene	3752	KCND3	80.882
myrcene	2983	GUCY1B3	55.444
myrcene	2628	GATM	55.444
myrcene	50801	KCNK4	55.444
myrcene	389434	IYD	55.444
myrcene	3784	KCNQ1	55.444
myrcene	2203	FBP1	22.373
myrcene	9162	DGKI	22.373
myrcene	131	ADH7	22.373
myrcene	4781	NFIB	22.373
myrcene	114757	CYGB	22.373
myrcene	9369	NRXN3	22.373
myrcene	94030	LRRC4B	22.373
myrcene	343	AQP8	22.373
myrcene	170302	ARX	22.373
myrcene	3479	IGF1	22.373
myrcene	85358	SHANK3	22.373
myrcene	91703	ACY3	22.373
myrcene	443	ASPA	22.373
myrcene	9378	NRXN1	22.373
myrcene	1906	EDN1	22.373
myrcene	5020	OXT	22.373
myrcene	9863	MAGI2	22.373
myrcene	348	APOE	22.373
myrcene	6665	SOX15	22.373
myricadiol	2099	ESR1	122.778
myricadiol	5241	PGR	122.778
myricadiol	367	AR	48
myricadiol	2908	NR3C1	48
myricadiol	301	ANXA1	48
myricadiol	7421	VDR	48
n-octane	51228	GLTP	known target in DrugBank
n-octane	5566	PRKACA	known target in DrugBank
naringin	6646	SOAT1	48
naringin	4547	MTTP	48
naringin	8435	SOAT2	48
neohesperidin	6646	SOAT1	48
neohesperidin	4547	MTTP	48
neohesperidin	8435	SOAT2	48
nerol	51109	RDH11	80.882
nerol	5949	RBP3	80.882
nerol	54884	RETSAT	80.882
nerol	112724	RDH13	80.882
nerol	9249	DHRS3	80.882
nerol	5959	RDH5	80.882
nerol	220	ALDH1A3	80.882
nerol	145226	RDH12	80.882
nerol	10901	DHRS4	80.882
nerol	5947	RBP1	80.882
nerol	216	ALDH1A1	80.882
nerol	6017	RLBP1	80.882
nerol	57665	RDH14	80.882
nerol	50700	RDH8	80.882
nerol	9227	LRAT	80.882
nerol	8854	ALDH1A2	80.882
nerol	218	ALDH3A1	55.444
nerol	6010	RHO	55.444
nerol	6247	RS1	55.444
nerol	1512	CTSH	22.373
nerol	94233	OPN4	22.373
nerol	157506	RDH10	22.373
nerol	64577	ALDH8A1	22.373
nerol	6462	SHBG	22.373
nerol	10202	DHRS2	22.373
nerol	51478	HSD17B7	22.373
nerol	367	AR	22.373
nerol	7067	THRA	22.373
nerol	5076	PAX2	22.373
nerol	874	CBR3	22.373
nerol	2625	GATA3	22.373
nerol	429	ASCL1	22.373
nerol	1749	DLX5	22.373
nerol	5979	RET	22.373
nerol	7068	THRB	22.373
nerol	1428	CRYM	22.373
nerol	706	TSPO	22.373
nerol	221391	OPN5	22.373
nerol	10170	DHRS9	22.373
nerol	873	CBR1	22.373
nerol	1543	CYP1A1	22.373
nobiletin	6646	SOAT1	48
nobiletin	4547	MTTP	48
nobiletin	8435	SOAT2	48
nobilin	3156	HMGCR	80.882
nobilin	3689	ITGB2	80.882
nobilin	3683	ITGAL	80.882
nobilin	3066	HDAC2	80.882
nobilin	5578	PRKCA	48
nobilin	5580	PRKCD	48
nobilin	4306	NR3C2	48
nobilin	3065	HDAC1	23
nobilin	4058	LTK	22.373
nobilin	23411	SIRT1	22.373
nobilin	6495	SIX1	22.373
nobilin	51804	SIX4	22.373
nobilin	6688	SPI1	22.373
nobilin	7320	UBE2B	22.373
nobilin	7157	TP53	22.373
nobilin	815	CAMK2A	22.373
nobilin	1401	CRP	22.373
nobilin	8289	ARID1A	22.373
nobilin	220972	2019-03-08	22.373
nobilin	3630	INS	22.373
nobilin	7480	WNT10B	22.373
nobilin	57103	TIGAR	22.373
nobilin	5196	PF4	22.373
nobilin	817	CAMK2D	22.373
nobilin	3586	IL10	22.373
nobilin	998	CDC42	22.373
nobilin	1499	CTNNB1	22.373
nobilin	1896	EDA	22.373
nobilin	134	ADORA1	22.373
nobilin	10332	CLEC4M	22.373
nobilin	2778	GNAS	22.373
nobilin	4799	NFX1	22.373
obtusifoliol	2099	ESR1	122.778
obtusifoliol	5241	PGR	122.778
obtusifoliol	7421	VDR	80.882
obtusifoliol	1594	CYP27B1	80.882
obtusifoliol	2638	GC	55.444
obtusifoliol	22938	SNW1	55.444
obtusifoliol	6715	SRD5A1	48
obtusifoliol	367	AR	48
obtusifoliol	2908	NR3C1	48
obtusifoliol	301	ANXA1	48
obtusifoliol	4790	NFKB1	22.373
obtusifoliol	8644	AKR1C3	22.373
obtusifoliol	1591	CYP24A1	22.373
obtusifoliol	151306	GPBAR1	22.373
obtusifoliol	6591	SNAI2	22.373
obtusifoliol	5469	MED1	22.373
obtusifoliol	6615	SNAI1	22.373
obtusifoliol	1576	CYP3A4	22.373
obtusifoliol	793	CALB1	22.373
obtusifoliol	8074	FGF23	22.373
obtusifoliol	2672	GFI1	22.373
obtusifoliol	55915	LANCL2	22.373
obtusifoliol	54361	WNT4	22.373
obtusifoliol	6929	TCF3	22.373
obtusifoliol	581	BAX	22.373
obtusifoliol	9365	KL	22.373
obtusifoliol	120227	CYP2R1	22.373
obtusifoliol	5371	PML	22.373
obtusifoliol	2683	B4GALT1	22.373
obtusifoliol	795	S100G	22.373
obtusifoliol	1593	CYP27A1	22.373
obtusifoliol	25959	KANK2	22.373
obtusifoliol	10265	IRX5	22.373
obtusifoliol	6256	RXRA	22.373
obtusifoliol	9971	NR1H4	22.373
obtusifoliol	8805	TRIM24	22.373
ocimene	3750	KCND1	80.882
ocimene	3738	KCNA3	80.882
ocimene	5564	PRKAB1	80.882
ocimene	124	ADH1A	80.882
ocimene	3744	KCNA10	80.882
ocimene	2593	GAMT	80.882
ocimene	3748	KCNC3	80.882
ocimene	3736	KCNA1	80.882
ocimene	3737	KCNA2	80.882
ocimene	7173	TPO	80.882
ocimene	847	CAT	80.882
ocimene	3745	KCNB1	80.882
ocimene	125	ADH1B	80.882
ocimene	1742	DLG4	80.882
ocimene	3747	KCNC2	80.882
ocimene	3746	KCNC1	80.882
ocimene	126	ADH1C	80.882
ocimene	9312	KCNB2	80.882
ocimene	3741	KCNA5	80.882
ocimene	6035	RNASE1	80.882
ocimene	3751	KCND2	80.882
ocimene	217	ALDH2	80.882
ocimene	3739	KCNA4	80.882
ocimene	3743	KCNA7	80.882
ocimene	3742	KCNA6	80.882
ocimene	3752	KCND3	80.882
ocimene	2983	GUCY1B3	55.444
ocimene	2628	GATM	55.444
ocimene	50801	KCNK4	55.444
ocimene	389434	IYD	55.444
ocimene	3784	KCNQ1	55.444
ocimene	2203	FBP1	22.373
ocimene	9162	DGKI	22.373
ocimene	131	ADH7	22.373
ocimene	4781	NFIB	22.373
ocimene	114757	CYGB	22.373
ocimene	9369	NRXN3	22.373
ocimene	94030	LRRC4B	22.373
ocimene	343	AQP8	22.373
ocimene	170302	ARX	22.373
ocimene	3479	IGF1	22.373
ocimene	85358	SHANK3	22.373
ocimene	91703	ACY3	22.373
ocimene	443	ASPA	22.373
ocimene	9378	NRXN1	22.373
ocimene	1906	EDN1	22.373
ocimene	5020	OXT	22.373
ocimene	9863	MAGI2	22.373
ocimene	348	APOE	22.373
ocimene	6665	SOX15	22.373
octanal	11280	SCN11A	48
octanal	6327	SCN2B	48
octanal	18	ABAT	48
octanal	6323	SCN1A	48
octanal	55800	SCN3B	48
octanal	6328	SCN3A	48
octanal	6332	SCN7A	48
octanal	6331	SCN5A	48
octanal	6336	SCN10A	48
octanal	6718	AKR1D1	48
octanal	7915	ALDH5A1	48
octanal	6326	SCN2A	48
octanal	9734	HDAC9	48
octanal	7299	TYR	48
octanal	6335	SCN9A	48
octanal	6329	SCN4A	48
octanal	6330	SCN4B	48
octanal	6716	SRD5A2	48
octanal	36	ACADSB	48
octanal	6334	SCN8A	48
octanal	6324	SCN1B	48
octanal	4967	OGDH	48
octanal	3066	HDAC2	48
octanol	162514	TRPV3	122.778
octanol	4986	OPRK1	122.778
octanol	79054	TRPM8	122.778
octanol	8989	TRPA1	122.778
octanol	50801	KCNK4	55.444
octanol	11280	SCN11A	48
octanol	6327	SCN2B	48
octanol	18	ABAT	48
octanol	6323	SCN1A	48
octanol	55800	SCN3B	48
octanol	6328	SCN3A	48
octanol	6332	SCN7A	48
octanol	6331	SCN5A	48
octanol	6336	SCN10A	48
octanol	6718	AKR1D1	48
octanol	7915	ALDH5A1	48
octanol	6326	SCN2A	48
octanol	9734	HDAC9	48
octanol	7299	TYR	48
octanol	6335	SCN9A	48
octanol	6329	SCN4A	48
octanol	6330	SCN4B	48
octanol	6716	SRD5A2	48
octanol	36	ACADSB	48
octanol	6334	SCN8A	48
octanol	6324	SCN1B	48
octanol	4967	OGDH	48
octanol	3066	HDAC2	48
octanol	89	ACTN3	22.373
octanol	6863	TAC1	22.373
octanol	4804	NGFR	22.373
octanol	150	ADRA2A	22.373
octanol	7442	TRPV1	22.373
octanol	2255	FGF10	22.373
octanol	7415	VCP	22.373
octanol	3091	HIF1A	22.373
octanol	664	BNIP3	22.373
octanol	1392	CRH	22.373
octanol	4747	NEFL	22.373
octanol	90226	UCN2	22.373
octanol	6608	SMO	22.373
octanol	6865	TACR2	22.373
octanol	358	AQP1	22.373
octanol	255061	TAC4	22.373
octanol	1001	CDH3	22.373
octanol	863	CBFA2T3	22.373
octanol	4744	NEFH	22.373
octanol	1395	CRHR2	22.373
p-cymene	2561	GABRB2	80.882
p-cymene	2562	GABRB3	80.882
p-cymene	2147	F2	80.882
p-cymene	2850	GPR27	55.444
p-cymene	948	CD36	22.373
p-cymene	6385	SDC4	22.373
p-cymene	961	CD47	22.373
p-cymene	636	BICD1	22.373
perillaldehyde	1586	CYP17A1	122.778
perillaldehyde	2099	ESR1	122.778
perillaldehyde	5241	PGR	122.778
perillaldehyde	4986	OPRK1	122.778
perillaldehyde	4306	NR3C2	122.778
perillaldehyde	43	ACHE	80.882
perillaldehyde	590	BCHE	80.882
perillaldehyde	8292	COLQ	55.444
perillaldehyde	6715	SRD5A1	48
perillaldehyde	367	AR	48
perillaldehyde	2908	NR3C1	48
perillaldehyde	301	ANXA1	48
perillaldehyde	1588	CYP19A1	48
perillaldehyde	60482	SLC5A7	22.373
perillaldehyde	3084	NRG1	22.373
perillaldehyde	29958	DMGDH	22.373
perillaldehyde	6496	SIX3	22.373
perillaldehyde	1401	CRP	22.373
perillaldehyde	8492	PRSS12	22.373
perillaldehyde	80736	SLC44A4	22.373
perillaldehyde	501	ALDH7A1	22.373
perillaldehyde	26052	DNM3	22.373
perillaldehyde	429	ASCL1	22.373
perillaldehyde	133121	ENPP6	22.373
perillaldehyde	1006	CDH8	22.373
perillaldehyde	2339	FNTA	22.373
perillaldehyde	375790	AGRN	22.373
perillaldehyde	1119	CHKA	22.373
perillaldehyde	55349	CHDH	22.373
perillaldehyde	2902	GRIN1	22.373
periplocin	476	ATP1A1	122.778
periplocin	8001	GLRA3	23
periplocin	2562	GABRB3	23
physalin a	8001	GLRA3	48
physalin a	2908	NR3C1	48
physalin a	2562	GABRB3	48
physalin a	301	ANXA1	48
quercetin	3356	HTR2A	26.373
quercetin	3357	HTR2B	26.373
quercetin	150	ADRA2A	26.373
quercetin	3351	HTR1B	26.373
quercetin	3358	HTR2C	26.373
quercetin	3352	HTR1D	26.373
quercetin	1813	DRD2	26.373
quercetin	1815	DRD4	26.373
quercetin	3350	HTR1A	26.373
quercetin	152	ADRA2C	26.373
quercetin	50632	CALY	26.373
quercetin	1814	DRD3	26.373
quercetin	1816	DRD5	26.373
quercetin	1812	DRD1	26.373
quercetin	151	ADRA2B	26.373
rubixanthin	7421	VDR	80.882
rubixanthin	1594	CYP27B1	80.882
rubixanthin	2638	GC	55.444
rubixanthin	22938	SNW1	55.444
rubixanthin	51109	RDH11	48
rubixanthin	5949	RBP3	48
rubixanthin	54884	RETSAT	48
rubixanthin	112724	RDH13	48
rubixanthin	9249	DHRS3	48
rubixanthin	5959	RDH5	48
rubixanthin	2099	ESR1	48
rubixanthin	5241	PGR	48
rubixanthin	220	ALDH1A3	48
rubixanthin	145226	RDH12	48
rubixanthin	10901	DHRS4	48
rubixanthin	5947	RBP1	48
rubixanthin	216	ALDH1A1	48
rubixanthin	6017	RLBP1	48
rubixanthin	57665	RDH14	48
rubixanthin	50700	RDH8	48
rubixanthin	9227	LRAT	48
rubixanthin	8854	ALDH1A2	48
rubixanthin	4790	NFKB1	22.373
rubixanthin	8644	AKR1C3	22.373
rubixanthin	1591	CYP24A1	22.373
rubixanthin	151306	GPBAR1	22.373
rubixanthin	6591	SNAI2	22.373
rubixanthin	5469	MED1	22.373
rubixanthin	6615	SNAI1	22.373
rubixanthin	1576	CYP3A4	22.373
rubixanthin	793	CALB1	22.373
rubixanthin	8074	FGF23	22.373
rubixanthin	2672	GFI1	22.373
rubixanthin	55915	LANCL2	22.373
rubixanthin	54361	WNT4	22.373
rubixanthin	6929	TCF3	22.373
rubixanthin	581	BAX	22.373
rubixanthin	9365	KL	22.373
rubixanthin	120227	CYP2R1	22.373
rubixanthin	5371	PML	22.373
rubixanthin	2683	B4GALT1	22.373
rubixanthin	795	S100G	22.373
rubixanthin	1593	CYP27A1	22.373
rubixanthin	25959	KANK2	22.373
rubixanthin	10265	IRX5	22.373
rubixanthin	6256	RXRA	22.373
rubixanthin	9971	NR1H4	22.373
rubixanthin	8805	TRIM24	22.373
sabinenehydrate	162514	TRPV3	122.778
sabinenehydrate	4986	OPRK1	122.778
sabinenehydrate	79054	TRPM8	122.778
sabinenehydrate	8989	TRPA1	122.778
sabinenehydrate	2104	ESRRG	48
sabinenehydrate	1345	COX6C	48
sabinenehydrate	1329	COX5B	48
sabinenehydrate	1350	COX7C	48
sabinenehydrate	4512	COX1	48
sabinenehydrate	1646	AKR1C2	48
sabinenehydrate	9377	COX5A	48
sabinenehydrate	4514	COX3	48
sabinenehydrate	367	AR	48
sabinenehydrate	1346	COX7A1	48
sabinenehydrate	2235	FECH	48
sabinenehydrate	1327	COX4I1	48
sabinenehydrate	5319	PLA2G1B	48
sabinenehydrate	1339	COX6A2	48
sabinenehydrate	126	ADH1C	48
sabinenehydrate	1340	COX6B1	48
sabinenehydrate	2172	FABP6	48
sabinenehydrate	1066	CES1	48
sabinenehydrate	1349	COX7B	48
sabinenehydrate	4513	COX2	48
sabinenehydrate	1351	COX8A	48
sabinenehydrate	9971	NR1H4	48
sabinol	7421	VDR	80.882
sabinol	1594	CYP27B1	80.882
sabinol	2638	GC	55.444
sabinol	22938	SNW1	55.444
sabinol	4790	NFKB1	22.373
sabinol	8644	AKR1C3	22.373
sabinol	1591	CYP24A1	22.373
sabinol	151306	GPBAR1	22.373
sabinol	6591	SNAI2	22.373
sabinol	5469	MED1	22.373
sabinol	6615	SNAI1	22.373
sabinol	1576	CYP3A4	22.373
sabinol	793	CALB1	22.373
sabinol	2099	ESR1	22.373
sabinol	8074	FGF23	22.373
sabinol	2672	GFI1	22.373
sabinol	5241	PGR	22.373
sabinol	55915	LANCL2	22.373
sabinol	54361	WNT4	22.373
sabinol	6929	TCF3	22.373
sabinol	581	BAX	22.373
sabinol	9365	KL	22.373
sabinol	120227	CYP2R1	22.373
sabinol	5371	PML	22.373
sabinol	2683	B4GALT1	22.373
sabinol	795	S100G	22.373
sabinol	1593	CYP27A1	22.373
sabinol	25959	KANK2	22.373
sabinol	10265	IRX5	22.373
sabinol	6256	RXRA	22.373
sabinol	9971	NR1H4	22.373
sabinol	8805	TRIM24	22.373
salviol	2100	ESR2	122.778
salviol	2099	ESR1	122.778
salviol	8856	NR1I2	122.778
salviol	4986	OPRK1	48
salviol	4988	OPRM1	48
salviol	240	ALOX5	48
salviol	7022	TFAP2C	22.373
salviol	6513	SLC2A1	22.373
salviol	27324	TOX3	22.373
salviol	7040	TGFB1	22.373
salviol	5469	MED1	22.373
salviol	4824	NKX3-1	22.373
salviol	6469	SHH	22.373
salviol	51176	LEF1	22.373
salviol	2263	FGFR2	22.373
salviol	5241	PGR	22.373
salviol	9429	ABCG2	22.373
salviol	54361	WNT4	22.373
salviol	374	AREG	22.373
salviol	5244	ABCB4	22.373
salviol	2852	GPER1	22.373
salviol	7474	WNT5A	22.373
salviol	6662	SOX9	22.373
salviol	7421	VDR	22.373
salviol	5243	ABCB1	22.373
salviol	8805	TRIM24	22.373
stigmasterol	3750	KCND1	80.882
stigmasterol	3738	KCNA3	80.882
stigmasterol	5564	PRKAB1	80.882
stigmasterol	124	ADH1A	80.882
stigmasterol	3744	KCNA10	80.882
stigmasterol	2593	GAMT	80.882
stigmasterol	3748	KCNC3	80.882
stigmasterol	3736	KCNA1	80.882
stigmasterol	3737	KCNA2	80.882
stigmasterol	7173	TPO	80.882
stigmasterol	847	CAT	80.882
stigmasterol	3745	KCNB1	80.882
stigmasterol	125	ADH1B	80.882
stigmasterol	1742	DLG4	80.882
stigmasterol	3747	KCNC2	80.882
stigmasterol	3746	KCNC1	80.882
stigmasterol	126	ADH1C	80.882
stigmasterol	9312	KCNB2	80.882
stigmasterol	3741	KCNA5	80.882
stigmasterol	6035	RNASE1	80.882
stigmasterol	3751	KCND2	80.882
stigmasterol	217	ALDH2	80.882
stigmasterol	3739	KCNA4	80.882
stigmasterol	3743	KCNA7	80.882
stigmasterol	3742	KCNA6	80.882
stigmasterol	3752	KCND3	80.882
stigmasterol	2983	GUCY1B3	55.444
stigmasterol	2628	GATM	55.444
stigmasterol	50801	KCNK4	55.444
stigmasterol	389434	IYD	55.444
stigmasterol	3784	KCNQ1	55.444
stigmasterol	51109	RDH11	48
stigmasterol	5949	RBP3	48
stigmasterol	54884	RETSAT	48
stigmasterol	1586	CYP17A1	48
stigmasterol	112724	RDH13	48
stigmasterol	9249	DHRS3	48
stigmasterol	5959	RDH5	48
stigmasterol	2099	ESR1	48
stigmasterol	5241	PGR	48
stigmasterol	220	ALDH1A3	48
stigmasterol	145226	RDH12	48
stigmasterol	4986	OPRK1	48
stigmasterol	10901	DHRS4	48
stigmasterol	5947	RBP1	48
stigmasterol	216	ALDH1A1	48
stigmasterol	6017	RLBP1	48
stigmasterol	57665	RDH14	48
stigmasterol	50700	RDH8	48
stigmasterol	9227	LRAT	48
synephrine	2100	ESR2	80.882
synephrine	2099	ESR1	80.882
synephrine	8856	NR1I2	80.882
synephrine	148	ADRA1A	48
synephrine	154	ADRB2	48
synephrine	150	ADRA2A	48
synephrine	153	ADRB1	48
synephrine	6570	SLC18A1	48
synephrine	146	ADRA1D	48
synephrine	5053	PAH	48
synephrine	6571	SLC18A2	48
synephrine	147	ADRA1B	48
synephrine	152	ADRA2C	48
synephrine	240	ALOX5	48
synephrine	1812	DRD1	48
synephrine	155	ADRB3	48
synephrine	151	ADRA2B	48
synephrine	6530	SLC6A2	48
synephrine	7022	TFAP2C	22.373
synephrine	6513	SLC2A1	22.373
synephrine	27324	TOX3	22.373
synephrine	7040	TGFB1	22.373
synephrine	5469	MED1	22.373
synephrine	4824	NKX3-1	22.373
synephrine	6469	SHH	22.373
synephrine	51176	LEF1	22.373
synephrine	2263	FGFR2	22.373
synephrine	5241	PGR	22.373
synephrine	9429	ABCG2	22.373
synephrine	54361	WNT4	22.373
synephrine	374	AREG	22.373
synephrine	5244	ABCB4	22.373
synephrine	2852	GPER1	22.373
synephrine	7474	WNT5A	22.373
synephrine	6662	SOX9	22.373
synephrine	7421	VDR	22.373
synephrine	5243	ABCB1	22.373
synephrine	8805	TRIM24	22.373
terpinolene	3750	KCND1	80.882
terpinolene	3738	KCNA3	80.882
terpinolene	5564	PRKAB1	80.882
terpinolene	124	ADH1A	80.882
terpinolene	3744	KCNA10	80.882
terpinolene	2593	GAMT	80.882
terpinolene	3748	KCNC3	80.882
terpinolene	3736	KCNA1	80.882
terpinolene	3737	KCNA2	80.882
terpinolene	7173	TPO	80.882
terpinolene	847	CAT	80.882
terpinolene	3745	KCNB1	80.882
terpinolene	125	ADH1B	80.882
terpinolene	1742	DLG4	80.882
terpinolene	3747	KCNC2	80.882
terpinolene	3746	KCNC1	80.882
terpinolene	126	ADH1C	80.882
terpinolene	9312	KCNB2	80.882
terpinolene	3741	KCNA5	80.882
terpinolene	6035	RNASE1	80.882
terpinolene	3751	KCND2	80.882
terpinolene	217	ALDH2	80.882
terpinolene	3739	KCNA4	80.882
terpinolene	3743	KCNA7	80.882
terpinolene	3742	KCNA6	80.882
terpinolene	3752	KCND3	80.882
terpinolene	2983	GUCY1B3	55.444
terpinolene	2628	GATM	55.444
terpinolene	50801	KCNK4	55.444
terpinolene	389434	IYD	55.444
terpinolene	3784	KCNQ1	55.444
terpinolene	2203	FBP1	22.373
terpinolene	9162	DGKI	22.373
terpinolene	131	ADH7	22.373
terpinolene	4781	NFIB	22.373
terpinolene	114757	CYGB	22.373
terpinolene	9369	NRXN3	22.373
terpinolene	94030	LRRC4B	22.373
terpinolene	343	AQP8	22.373
terpinolene	170302	ARX	22.373
terpinolene	3479	IGF1	22.373
terpinolene	85358	SHANK3	22.373
terpinolene	91703	ACY3	22.373
terpinolene	443	ASPA	22.373
terpinolene	9378	NRXN1	22.373
terpinolene	1906	EDN1	22.373
terpinolene	5020	OXT	22.373
terpinolene	9863	MAGI2	22.373
terpinolene	348	APOE	22.373
terpinolene	6665	SOX15	22.373
terpinyl acetate	11280	SCN11A	80.882
terpinyl acetate	6327	SCN2B	80.882
terpinyl acetate	8801	SUCLG2	80.882
terpinyl acetate	9058	SLC13A2	80.882
terpinyl acetate	18	ABAT	80.882
terpinyl acetate	6323	SCN1A	80.882
terpinyl acetate	55800	SCN3B	80.882
terpinyl acetate	6561	SLC13A1	80.882
terpinyl acetate	8802	SUCLG1	80.882
terpinyl acetate	8630	HSD17B6	80.882
terpinyl acetate	6328	SCN3A	80.882
terpinyl acetate	1468	SLC25A10	80.882
terpinyl acetate	10536	P3H3	80.882
terpinyl acetate	64064	OXCT2	80.882
terpinyl acetate	55217	TMLHE	80.882
terpinyl acetate	6332	SCN7A	80.882
terpinyl acetate	5351	PLOD1	80.882
terpinyl acetate	6331	SCN5A	80.882
terpinyl acetate	6336	SCN10A	80.882
terpinyl acetate	56670	SUCNR1	80.882
terpinyl acetate	64849	SLC13A3	80.882
terpinyl acetate	6718	AKR1D1	80.882
terpinyl acetate	7915	ALDH5A1	80.882
terpinyl acetate	6326	SCN2A	80.882
terpinyl acetate	444	ASPH	80.882
terpinyl acetate	8424	BBOX1	80.882
terpinyl acetate	6390	SDHB	80.882
terpinyl acetate	9734	HDAC9	80.882
terpinyl acetate	7299	TYR	80.882
terpinyl acetate	6335	SCN9A	80.882
terpinyl acetate	5019	OXCT1	80.882
terpinyl acetate	6329	SCN4A	80.882
terpinyl acetate	6330	SCN4B	80.882
terpinyl acetate	8985	PLOD3	80.882
terpinyl acetate	5033	P4HA1	80.882
terpinyl acetate	6391	SDHC	80.882
terpinyl acetate	6716	SRD5A2	80.882
terpinyl acetate	36	ACADSB	80.882
terpinyl acetate	6334	SCN8A	80.882
terpinyl acetate	6324	SCN1B	80.882
terpinyl acetate	55214	P3H2	80.882
terpinyl acetate	6389	SDHA	80.882
terpinyl acetate	4967	OGDH	80.882
terpinyl acetate	8974	P4HA2	80.882
terpinyl acetate	8803	SUCLA2	80.882
terpinyl acetate	3066	HDAC2	80.882
terpinyl acetate	6392	SDHD	80.882
terpinyl acetate	64175	P3H1	80.882
terpinyl acetate	1638	DCT	55.444
terpinyl acetate	8644	AKR1C3	55.444
thujene	3750	KCND1	80.882
thujene	3738	KCNA3	80.882
thujene	5564	PRKAB1	80.882
thujene	124	ADH1A	80.882
thujene	3744	KCNA10	80.882
thujene	2593	GAMT	80.882
thujene	3748	KCNC3	80.882
thujene	3736	KCNA1	80.882
thujene	3737	KCNA2	80.882
thujene	7173	TPO	80.882
thujene	847	CAT	80.882
thujene	3745	KCNB1	80.882
thujene	125	ADH1B	80.882
thujene	1742	DLG4	80.882
thujene	3747	KCNC2	80.882
thujene	3746	KCNC1	80.882
thujene	126	ADH1C	80.882
thujene	9312	KCNB2	80.882
thujene	3741	KCNA5	80.882
thujene	6035	RNASE1	80.882
thujene	3751	KCND2	80.882
thujene	217	ALDH2	80.882
thujene	3739	KCNA4	80.882
thujene	3743	KCNA7	80.882
thujene	3742	KCNA6	80.882
thujene	3752	KCND3	80.882
thujene	2983	GUCY1B3	55.444
thujene	2628	GATM	55.444
thujene	50801	KCNK4	55.444
thujene	389434	IYD	55.444
thujene	3784	KCNQ1	55.444
thujene	2099	ESR1	48
thujene	5241	PGR	48
thujene	2203	FBP1	22.373
thujene	9162	DGKI	22.373
thujene	131	ADH7	22.373
thujene	4781	NFIB	22.373
thujene	114757	CYGB	22.373
thujene	9369	NRXN3	22.373
thujene	94030	LRRC4B	22.373
thujene	343	AQP8	22.373
thujene	170302	ARX	22.373
thujene	3479	IGF1	22.373
thujene	85358	SHANK3	22.373
thujene	91703	ACY3	22.373
thujene	443	ASPA	22.373
thujene	9378	NRXN1	22.373
thujene	1906	EDN1	22.373
thujene	5020	OXT	22.373
thujene	9863	MAGI2	22.373
thymol	2555	GABRA2	80.882
thymol	2563	GABRD	80.882
thymol	5139	PDE3A	80.882
thymol	2560	GABRB1	80.882
thymol	2567	GABRG3	80.882
thymol	7124	TNF	80.882
thymol	2564	GABRE	80.882
thymol	6326	SCN2A	80.882
thymol	2556	GABRA3	80.882
thymol	2565	GABRG1	80.882
thymol	2568	GABRP	80.882
thymol	2557	GABRA4	80.882
thymol	2561	GABRB2	80.882
thymol	43	ACHE	80.882
thymol	6329	SCN4A	80.882
thymol	55879	GABRQ	80.882
thymol	2562	GABRB3	80.882
thymol	2558	GABRA5	80.882
thymol	2559	GABRA6	80.882
thymol	2554	GABRA1	80.882
thymol	5142	PDE4B	80.882
thymol	590	BCHE	80.882
thymol	2566	GABRG2	80.882
thymol	5140	PDE3B	55.444
thymol	5144	PDE4D	55.444
thymol	8292	COLQ	55.444
thymol	4049	LTA	55.444
thymol	6256	RXRA	55.444
thymol	6531	SLC6A3	48
thymol	1813	DRD2	48
thymol	6532	SLC6A4	48
thymol	1815	DRD4	48
thymol	3363	HTR7	48
thymol	3350	HTR1A	48
thymol	1621	DBH	48
thymol	1814	DRD3	48
thymol	1816	DRD5	48
thymol	1812	DRD1	48
thymol	6530	SLC6A2	48
thymol	6323	SCN1A	23
thymol	6328	SCN3A	23
thymol	8091	HMGA2	22.373
thymol	8654	PDE5A	22.373
thymol	336	APOA2	22.373
thymol	60482	SLC5A7	22.373
thymol	10507	SEMA4D	22.373
thymol	3084	NRG1	22.373
thymol	972	CD74	22.373
thymol	3263	HPX	22.373
thymol	22933	SIRT2	22.373
zeaxanthin	7421	VDR	122.778
zeaxanthin	1594	CYP27B1	80.882
zeaxanthin	2638	GC	55.444
zeaxanthin	22938	SNW1	55.444
zeaxanthin	51109	RDH11	48
zeaxanthin	6257	RXRB	48
zeaxanthin	5949	RBP3	48
zeaxanthin	54884	RETSAT	48
zeaxanthin	112724	RDH13	48
zeaxanthin	9249	DHRS3	48
zeaxanthin	5959	RDH5	48
zeaxanthin	5918	RARRES1	48
zeaxanthin	190	NR0B1	48
zeaxanthin	2099	ESR1	48
zeaxanthin	5916	RARG	48
zeaxanthin	5241	PGR	48
zeaxanthin	5915	RARB	48
zeaxanthin	220	ALDH1A3	48
zeaxanthin	6258	RXRG	48
zeaxanthin	145226	RDH12	48
zeaxanthin	10901	DHRS4	48
zeaxanthin	5947	RBP1	48
zeaxanthin	216	ALDH1A1	48
zeaxanthin	6017	RLBP1	48
zeaxanthin	57665	RDH14	48
zeaxanthin	5914	RARA	48
zeaxanthin	50700	RDH8	48
zeaxanthin	9052	GPRC5A	48
zeaxanthin	9227	LRAT	48
zeaxanthin	6256	RXRA	48
zeaxanthin	8854	ALDH1A2	48
zeaxanthin	4790	NFKB1	22.373
zeaxanthin	8644	AKR1C3	22.373
zeaxanthin	1591	CYP24A1	22.373
zeaxanthin	151306	GPBAR1	22.373
zeaxanthin	6591	SNAI2	22.373
zeaxanthin	5469	MED1	22.373
zeaxanthin	6615	SNAI1	22.373
zeaxanthin	1576	CYP3A4	22.373
zeaxanthin	793	CALB1	22.373
zeaxanthin	8074	FGF23	22.373
zeaxanthin	2672	GFI1	22.373
zeaxanthin	55915	LANCL2	22.373
zeaxanthin	54361	WNT4	22.373
zeaxanthin	6929	TCF3	22.373
zeaxanthin	581	BAX	22.373
zeaxanthin	9365	KL	22.373
zeaxanthin	120227	CYP2R1	22.373
zeaxanthin	5371	PML	22.373
zeaxanthin	2683	B4GALT1	22.373
zederone	148	ADRA1A	23
zederone	81033	KCNH6	23
zederone	146	ADRA1D	23
zederone	3757	KCNH2	23
zederone	147	ADRA1B	23
zederone	90134	KCNH7	23
zederone	5261	PHKG2	22.373
zederone	7531	YWHAE	22.373
zederone	1139	CHRNA7	22.373
zederone	3630	INS	22.373
zederone	4878	NPPA	22.373
zederone	796	CALCA	22.373
